# Supplementary material
Source: PubMed Central journal article supplement (PMC7447531)
Supplement: NIHMS1618522-supplement-Supplementary_Table_S1.pdf [file NIHMS1618522-supplement-Supplementary_Table_S1.pdf]

Table S1 Antibody information

| <b>Antibody</b>   | <b>Cat#</b> | <b>Vendor</b>  | <b>Dilution ratio</b> |
|-------------------|-------------|----------------|-----------------------|
| P-mTOR(s2448)     | 5536        | Cell signaling | 1:1000                |
| HER2              | SC-33684    | Santa Cruz     | 1:3000                |
| pHER2(y1221/1222) | 2243        | Cell Signaling | 1:2000                |
| pHER3(y1289)      | 4791        | Cell signaling | 1:1000                |
| P-p70s6K(T389)    | 9234        | Cell signaling | 1:1000                |
| Akt               | 9272        | Cell signaling | 1:1000                |
| pAkt(s473)        | 9271        | Cell signaling | 1:1000                |
| P-ERK1/2          | 4370        | Cell signaling | 1:1000                |
| P-4EBP1           | 9456        | Cell signaling | 1:1000                |
| rpS6              | 2317        | Cell signaling | 1:2000                |
| P-rpS6(s235/236)  | 2211        | Cell signaling | 1:2000                |
| Ki67              | sc-23900    | Santa Cruz     | 1:500                 |
| $\beta$ -actin    | A2228       | Sigma          | 1:5000                |
